# Supplementary material for: Characterization of OsPIN2 Mutants Reveal Novel Roles for Reactive Oxygen Species in Modulating Not Only Root Gravitropism but Also Hypoxia Tolerance in Rice Seedlings
Source: MDPI journal article supplement (doi:10.3390/plants13040476), 2024-02-07
Supplement: s1 [file s1]

**Table S1.** The primers used for RT-qPCR analysis in this study.

| Gene ID        | Primer name | Primer sequences        |
|----------------|-------------|-------------------------|
| LOC_Os03g50885 | OsActin1-F  | GTGGTCGCCCCCTCCTGAAAG   |
|                | OsActin1-R  | GGCTTAGCATTCTTGGGTCCG   |
| LOC_Os01g25820 | OsNOX1-F    | GGCTTCAATGCCTTCTGGT     |
|                | OsNOX1-R    | ATGGCTCCTAAACAACCGA     |
| LOC_Os01g53294 | OsNOX2-F    | ATCCGCAAAATAAGCACCTCT   |
|                | OsNOX2-R    | CAGTAGCCCATCACATCAAAGAC |
| LOC_Os01g61880 | OsNOX3-F    | TCAAGGCAGCGATTTACCC     |
|                | OsNOX3-R    | CTCGCAAGCCTTCCCCAAA     |
| LOC_Os05g38980 | OsNOX4-F    | CACAAGGTTATCGCACTGACG   |
|                | OsNOX4-R    | AGCGATGAGTATGTTGGTTGA   |
| LOC_Os05g45210 | OsNOX5-F    | CCAGTGGGTGGGAAAAGTG     |
|                | OsNOX5-R    | GTCCGATTGGCGGGTAAA      |
| LOC_Os08g35210 | OsNOX6-F    | CCTTTCTCCATCACTTCAGCA   |
|                | OsNOX6-R    | GGGCCATCTACAAGCAACC     |
| LOC_Os09g26660 | OsNOX7-F    | GTCAAATGCTTATGCTGTCA    |
|                | OsNOX7-R    | TGTCCAGTCTCCGTTTGT      |
| LOC_Os11g33120 | OsNOX8-F    | ACCTTACCTGCGATTTTCCA    |
|                | OsNOX8-R    | ACGAAGCAGTGGTGGGAGT     |
| LOC_Os12g35610 | OsNOX9-F    | TACTTCGGGCAGACACGGAT    |
|                | OsNOX9-R    | GCGGGTTGCTGTCTACTAAG    |
| LOC_Os08g09860 | OsGOX6-F    | ATGCCCCGTAATGATTGCTCC   |
|                | OsGOX6-R    | GGCTCTTCTGACGAACTGCTC   |
| LOC_Os09g11460 | OsSUB1B-F   | GACGAGGTTCCCGCATCTA     |
|                | OsSUB1B-R   | GTCGGAGCAGCACTCGATGA    |
